# Supplementary material
Source: Frontiers journal article supplement (https://www.frontiersin.org/articles/184162)
Supplement: Image_3.PDF [file Image_3.PDF]

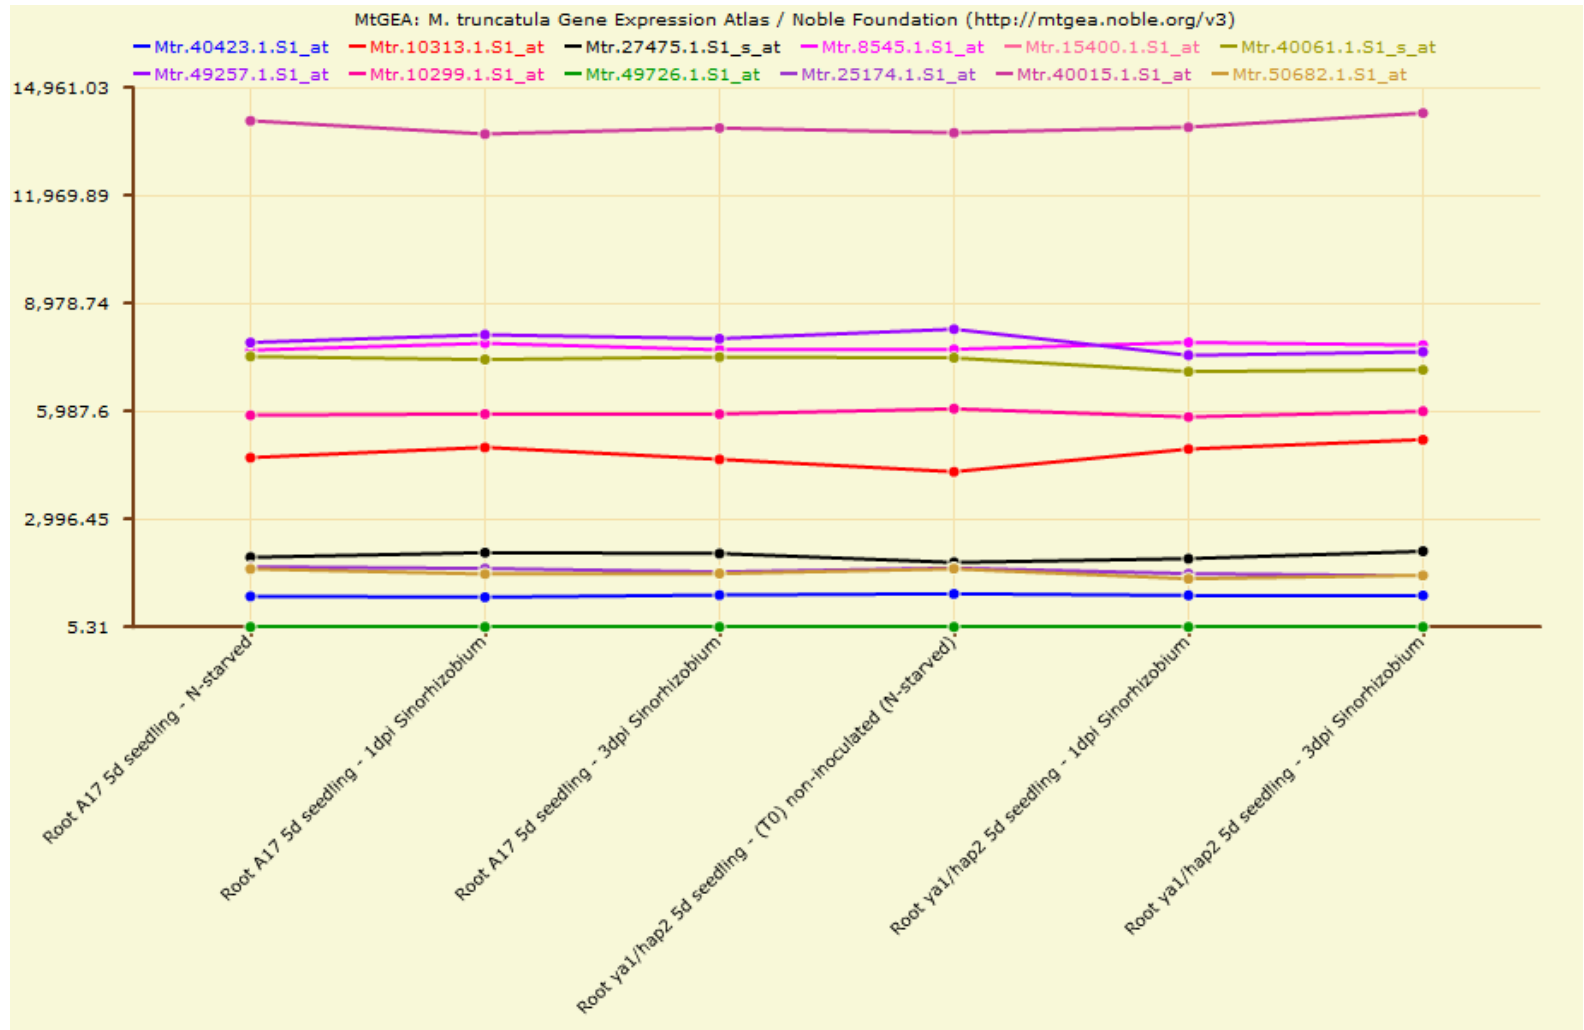

**Figure S3** Expression data of *Mt14-3-3* genes after an *S. meliloti* infection from the Medicago gene atlas (<http://mtgea.noble.org/v3/>). The expression levels of the *Mt14-3-3* genes in roots were analyzed at different time points (1 and 3 dpi) after *S. meliloti* infection.
